# Supplementary material for: Zinc-based electron transport materials for over 9.6%-efficient S-rich Sb2(S,Se)3 solar cells
Source: Royal Society of Chemistry journal article supplement (doi:10.1039/d1ta02356j), 2021-01-01
Supplement: d1ta02356j1.pdf [file d1ta02356j1.pdf]

## Supporting Information

### Zinc-based Electron Transport Materials for Over 9.6 %- Efficient S-rich $\text{Sb}_2(\text{S},\text{Se})_3$ Solar Cells

Yuqi Zhao<sup>a</sup>, Chuang Li<sup>a</sup>, Jiabin Niu<sup>b</sup>, Zong Zhi<sup>c</sup>, Guilin Chen<sup>d</sup>, Junbo Gong<sup>a</sup>, Jianmin Li<sup>\*a</sup>,

Xudong Xiao<sup>\*a</sup>

a. School of Physics and Technology, Wuhan University, Wuhan 430072, China.

b. Engineering Product Development, Singapore University of Technology and Design,

Singapore 487372.

c. Department of Physics, The Chinese University of Hong Kong, Shatin 999077, Hong Kong.

d. College of Physics and Energy, Fujian Normal University, Fuzhou 350007, China

E-mail: [ljmphy@whu.edu.cn](mailto:ljmphy@whu.edu.cn), [xdxiao@whu.edu.cn](mailto:xdxiao@whu.edu.cn)

Corresponding authors: Jianmin Li (Dr. Li), Xudong Xiao (Prof. Xiao)

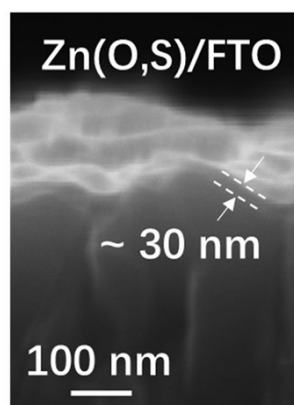

**Figure S1** SEM image of Zn(O,S) layer deposited onto FTO substrate. The thickness of Zn(O,S) is about 30 nm.

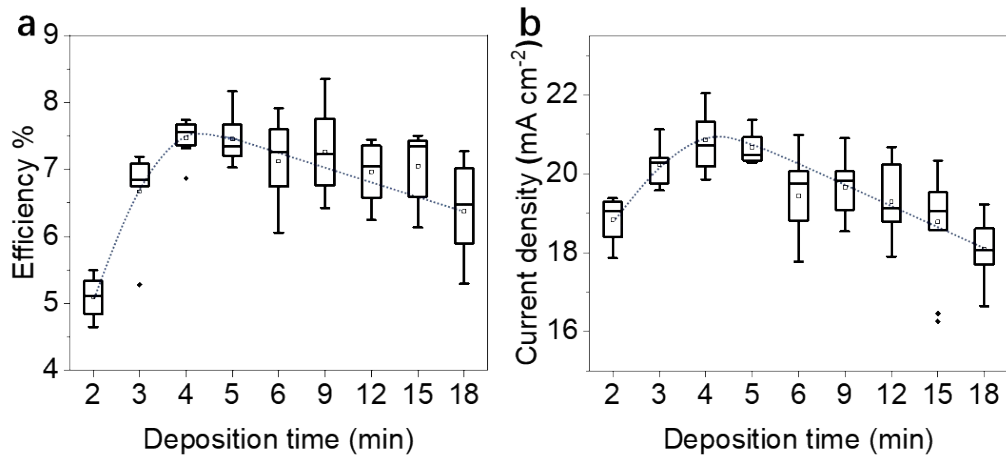

18

19 **Figure S2** Statistical boxplot of conversion efficiency (%) and current density ( $mA\ cm^{-2}$ ) for  
 20  $Zn(O,S)/CdS$ -based  $Sb_2(S,Se)_3$  solar cells as a function of CdS deposition time (2 min - 18 min).

21

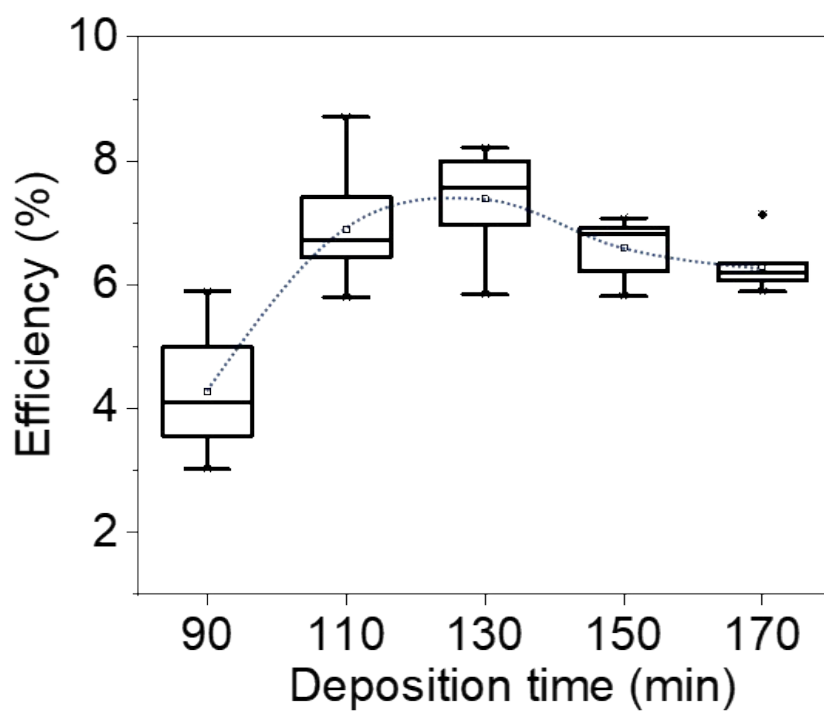

22

23 **Figure S3** Statistical boxplot of conversion efficiency for Zn(O,S)/CdS ETL -based  $\text{Sb}_2(\text{S,Se})_3$  solar  
24 cells as a function of  $\text{Sb}_2(\text{S,Se})_3$  deposition time (90 min - 170 min), for which CdS deposition time  
25 is fixed at 4 min.

26

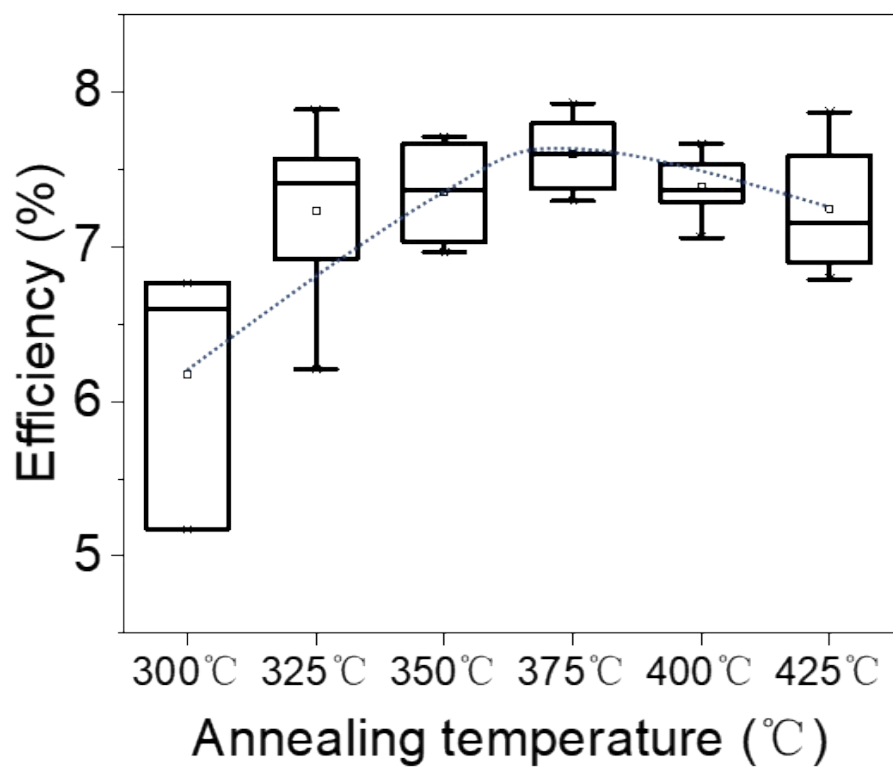

27

28 **Figure S4** Statistical boxplot of conversion efficiency for Zn(O,S)/CdS ETL-based Sb<sub>2</sub>(S,Se)<sub>3</sub> solar  
29 cells as a function of annealing temperature of CdCl<sub>2</sub> treatment (300°C - 425°C). The CdS deposition  
30 time is fixed at 4 min and the Sb<sub>2</sub>(S,Se)<sub>3</sub> deposition time at 130 min.

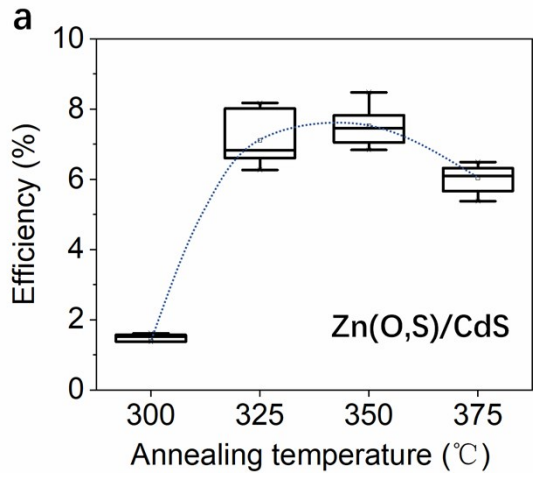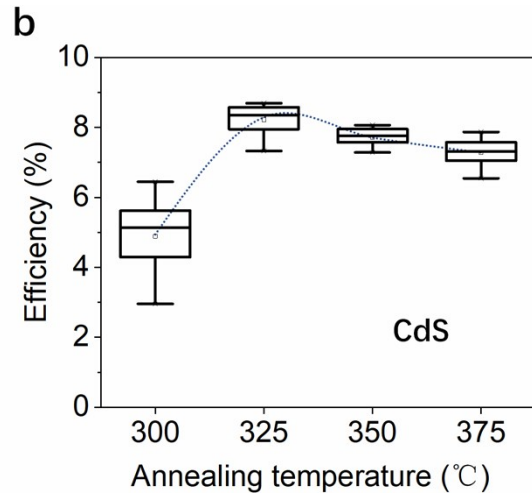

31

32 **Figure S5** Statistical boxplot of conversion efficiency (%) for Zn(O,S)/CdS ETL-based and CdS

33 ETL-based  $\text{Sb}_2(\text{S,Se})_3$  solar cells as a function of annealing temperature of  $\text{Sb}_2(\text{S,Se})_3$  layer.

34

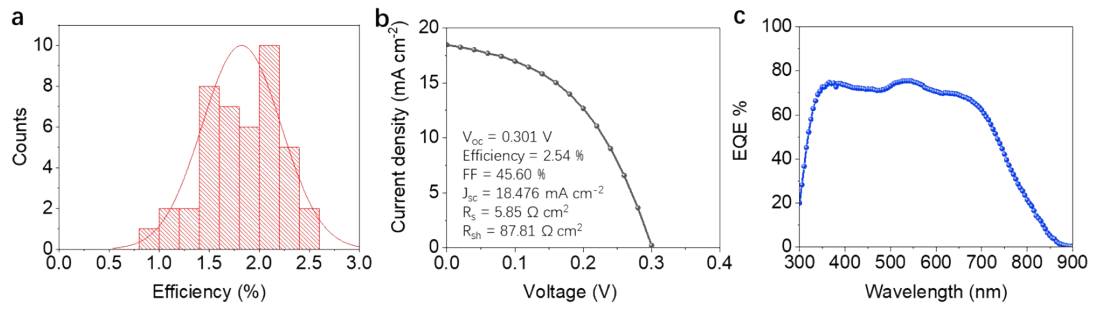

35

36 **Figure S6** (a) Histogram of device conversion efficiencies obtained from over 40 individual solar  
37 cells fabricated with a thin CdS ETL that only uses 4 min deposition time. (b)  $J$ - $V$  curve and (c)  
38 EQE spectrum of a representative solar cell with only 4 min CdS deposition.

39

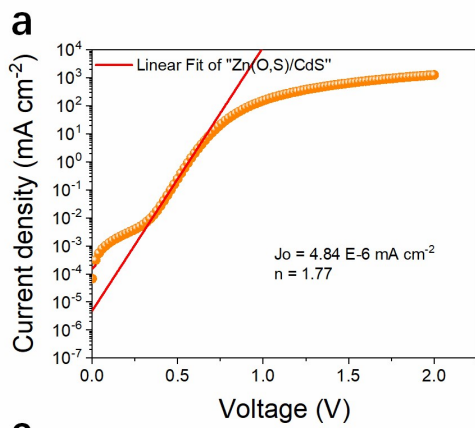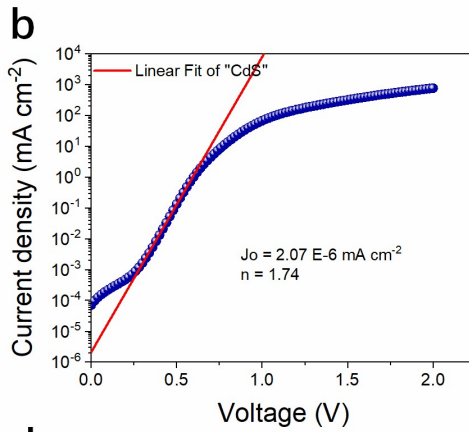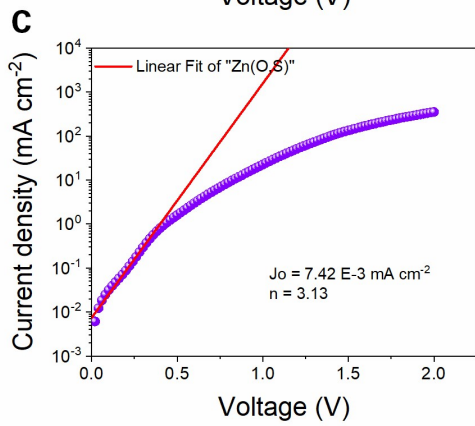

**d**

| ETLs        | n    | Jo<br>( $\text{mA cm}^{-2}$ ) |
|-------------|------|-------------------------------|
| Zn(O,S)/CdS | 1.77 | 4.84 e-6                      |
| CdS         | 1.74 | 2.07 e-6                      |
| Zn(O,S)     | 3.13 | 7.42 e-3                      |

40

41 **Figure S7** Semi-logarithmic  $J$ - $V$  plots for diode ideality factor ( $n$ ) and saturation current density  
 42 ( $J_0$ ) calculations.

43

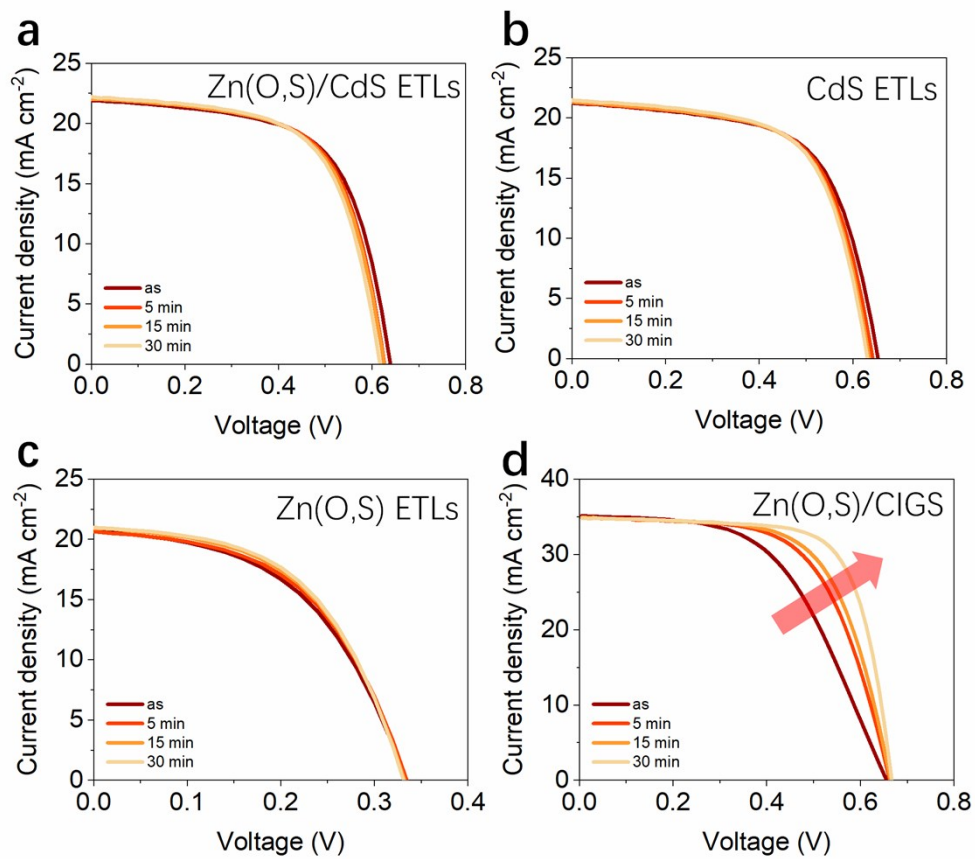

44

45 **Figure S8** Illumination time dependence of  $J-V$  curves for  $\text{Sb}_2(\text{S,Se})_3$  solar cells: (a) with  
 46 Zn(O,S)/CdS ETL, (b) with CdS ETL, and (c) with Zn(O,S) ETL. (d) Illumination time dependence  
 47 of  $J-V$  curves for a Zn(O,S)-based CIGS thin-film solar cell.

48



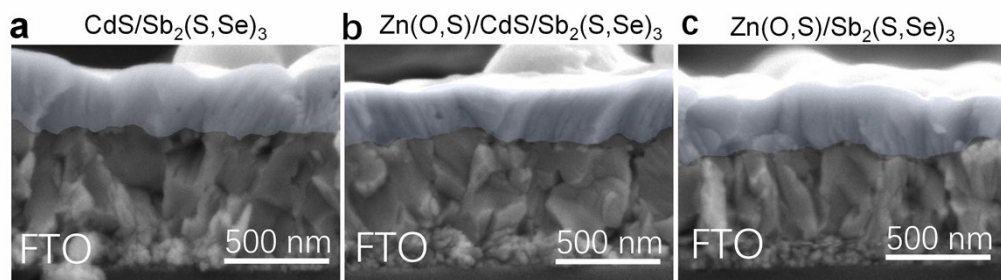

49

50 **Figure S9** Cross-sectional SEM images of annealed Sb<sub>2</sub>(S,Se)<sub>3</sub> layer deposited on CdS,  
51 Zn(O,S)/CdS, and Zn(O,S) ETLs, respectively.

52

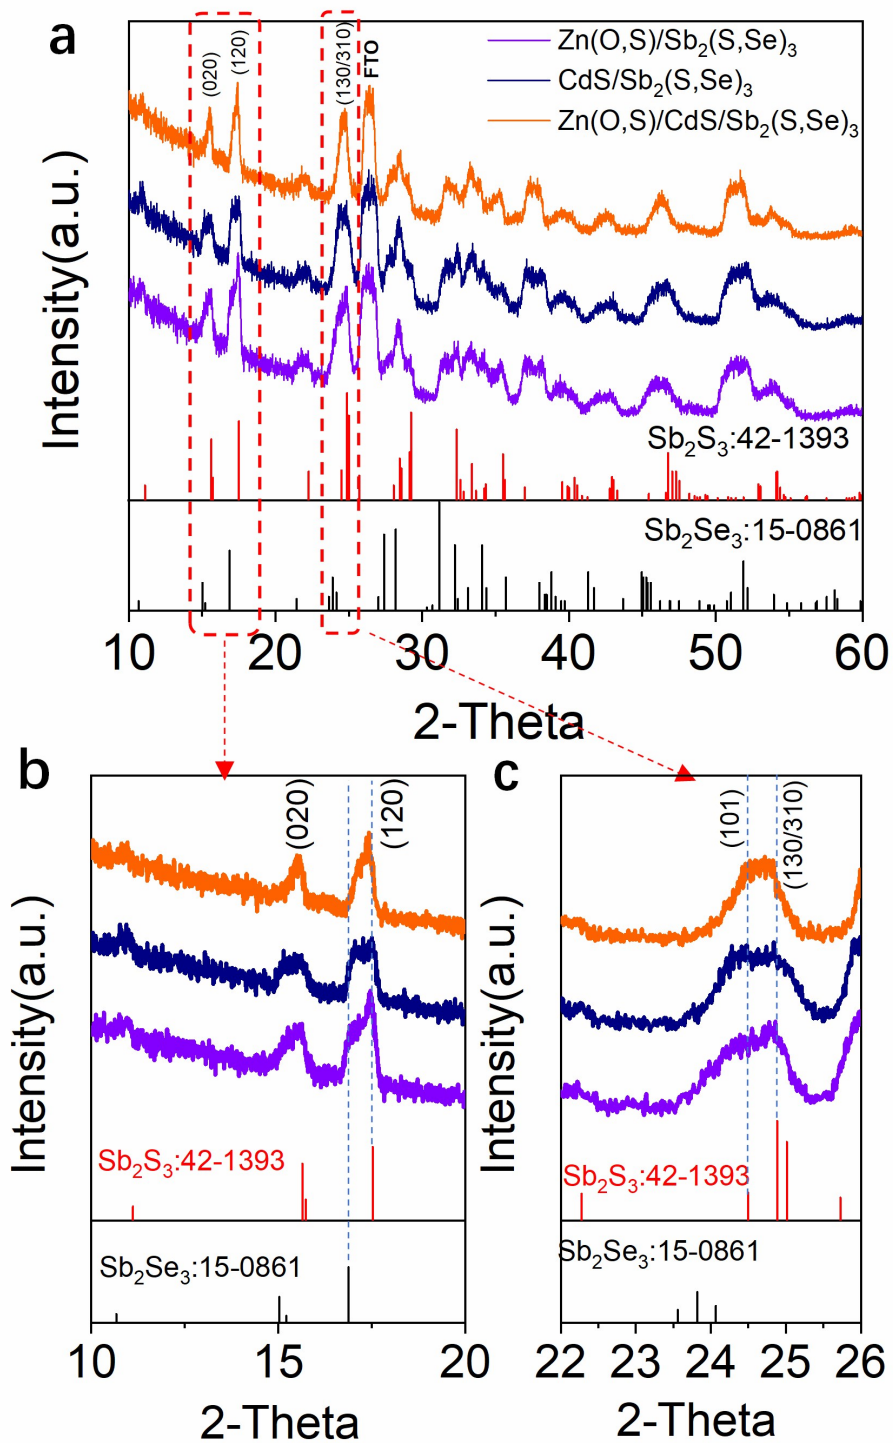

53

54 **Figure S10** GIXRD spectra of Sb<sub>2</sub>(S,Se)<sub>3</sub> layer deposited on different ETLs: Zn(O,S)/CdS, CdS,  
55 and Zn(O,S).

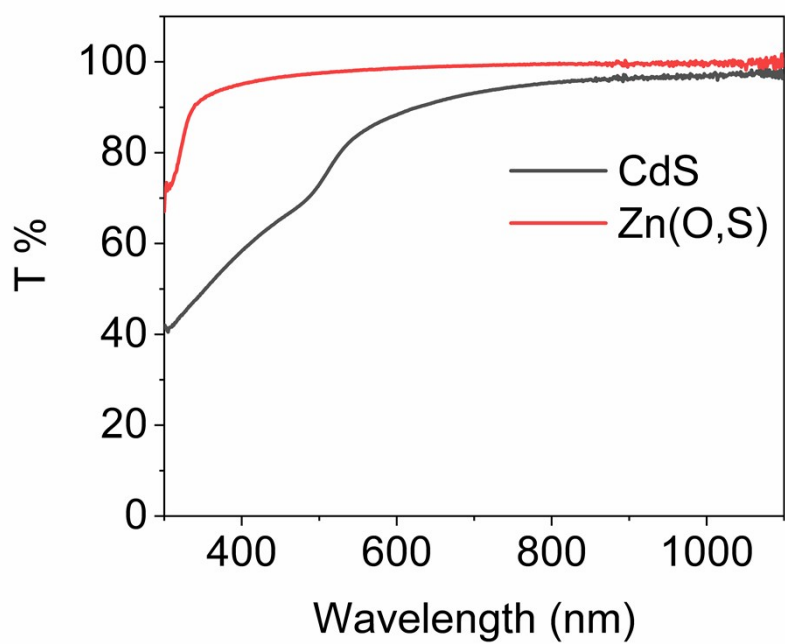

57  
58  
59

**Figure S11** Transmittance spectra of pure Zn(O,S) and CdS layers without CdCl<sub>2</sub>-PDT.

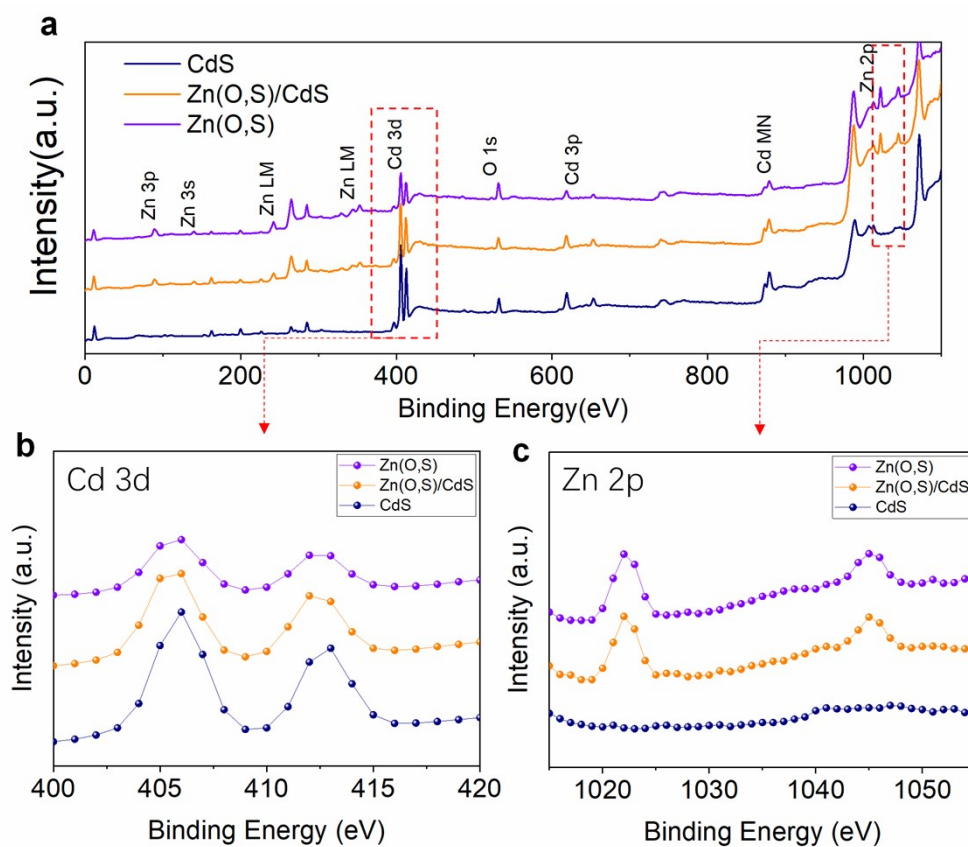

61

62 **Figure S12** (a) XPS full spectra of different ETLs: Zn(O,S), Zn(O,S)/CdS, CdS. (b) Cd 3d and (c)

63 Zn 2p XPS signals of various ETLs' surfaces.

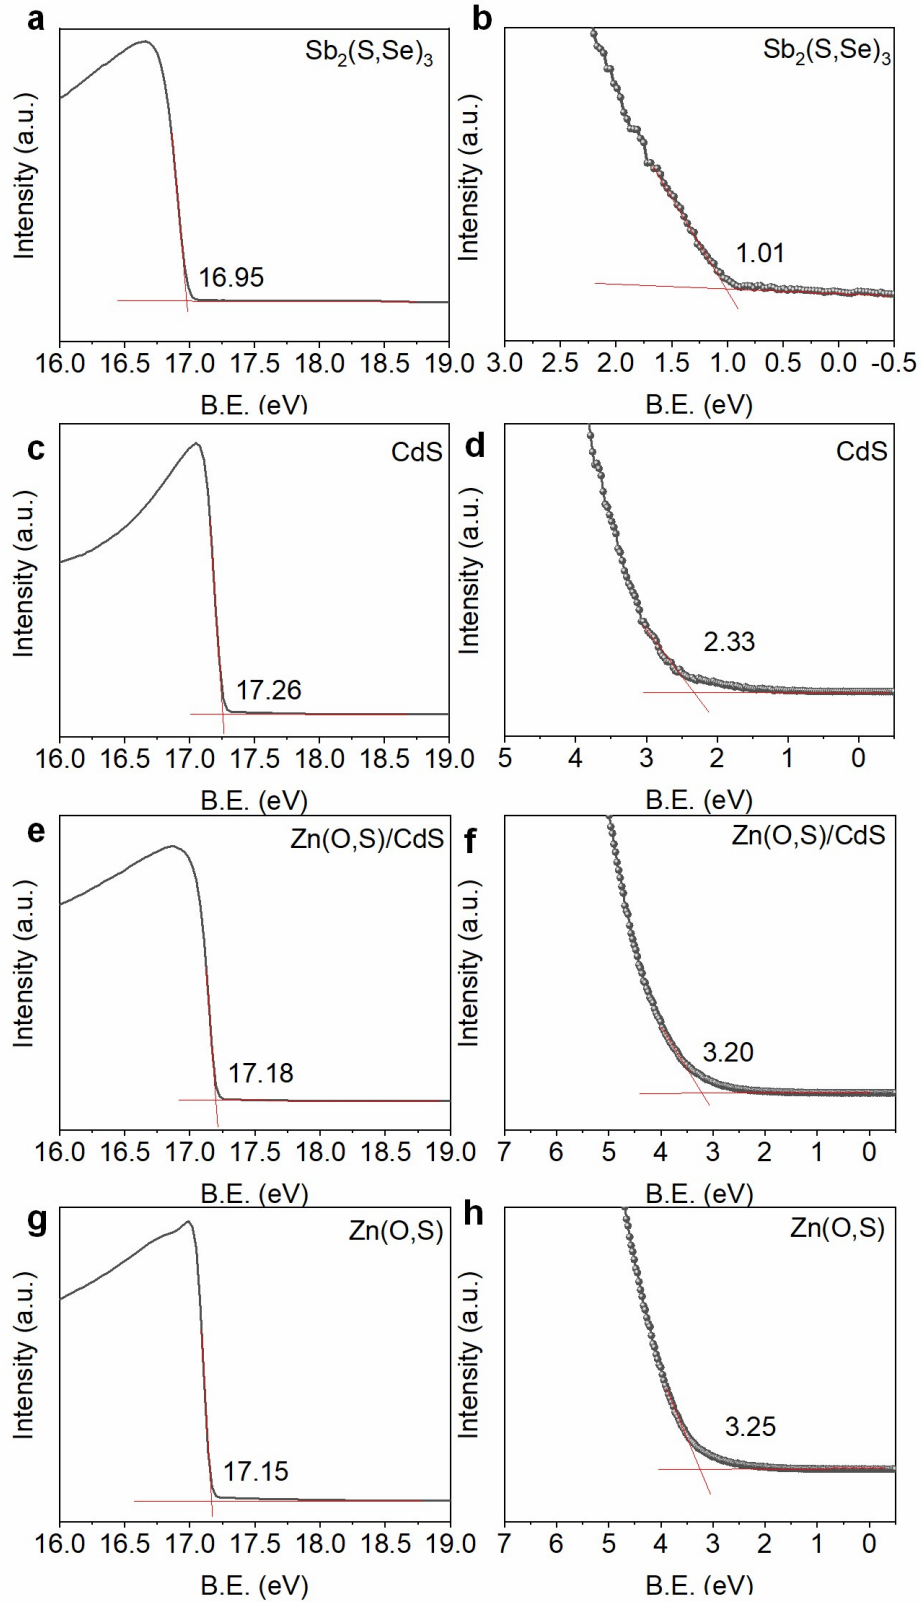

65

66 **Figure S13** Secondary electron cut-offs and valence band edge estimated from the UPS spectrum  
 67 of (a-b)  $\text{Sb}_2(\text{S,Se})_3$ , (c-d) CdS ETL, (e-f) Zn(O,S)/CdS ETL, and (g-h) Zn(O,S) ETL.

68

69 **Table S1** Parameters of Sb-based solar cells with Cd-free or Cd-reduced ETLs.

| ETLs                                                                                                      | Structure                                                                                              | V <sub>oc</sub><br>(V) | PCE<br>(%) | FF<br>(%) | J <sub>sc</sub><br>(mA<br>cm <sup>-2</sup> ) | ref  |
|-----------------------------------------------------------------------------------------------------------|--------------------------------------------------------------------------------------------------------|------------------------|------------|-----------|----------------------------------------------|------|
| TiO <sub>2</sub>                                                                                          | FTO/bl-TiO <sub>2</sub> /mp-TiO <sub>2</sub> /Sb <sub>2</sub> S <sub>3</sub> /PCPDTBT/PEDOT:PSS/Au     | 0.711                  | 7.5        | 65        | 16.1                                         | [1]  |
|                                                                                                           | FTO/c-TiO <sub>2</sub> /Sb <sub>2</sub> S <sub>3</sub> /Spiro-OMeTAD/Au                                | 0.69                   | 6.56       | 55.18     | 17.3                                         | [2]  |
|                                                                                                           | FTO/TiO <sub>2</sub> /Sb <sub>2</sub> S <sub>3</sub> /spiro-OMeTAD/Au                                  | 0.599                  | 4.93       | 47.62     | 15.39                                        | [3]  |
|                                                                                                           | FTO/mp-TiO <sub>2</sub> /Sb <sub>2</sub> S <sub>3</sub> /PCPDTBT-PCBM/Au                               | 0.595                  | 6.3        | 65.5      | 16                                           | [4]  |
|                                                                                                           | FTO/c-TiO <sub>2</sub> /Sb <sub>2</sub> S <sub>3</sub> /Spiro-OMeTAD/Au                                | 0.671                  | 6.78       | 54.8      | 18.43                                        | [5]  |
|                                                                                                           | FTO/TiO <sub>2</sub> /Sb <sub>2</sub> S <sub>3</sub> /P3HT/Au                                          | 0.5                    | 1.9        | 42        | 8.94                                         | [6]  |
|                                                                                                           | FTO/bl-TiO <sub>2</sub> /TiO <sub>2</sub> array/Sb <sub>2</sub> S <sub>3</sub> /Spiro-OMeTAD/Au        | 0.71                   | 5.8        | 50.72     | 16.11                                        | [7]  |
|                                                                                                           | FTO/TiO <sub>2</sub> /Sb <sub>2</sub> S <sub>3</sub> /spiro-OMeTAD/Au                                  | 0.65                   | 7.08       | 61.61     | 17.69                                        | [8]  |
|                                                                                                           | FTO/c-TiO <sub>2</sub> /Sb <sub>2</sub> S <sub>3</sub> /Spiro-OMeTAD/Au                                | 0.647                  | 6.35       | 57.1      | 17.19                                        | [9]  |
|                                                                                                           | FTO/TiO <sub>2</sub> /Sb <sub>2</sub> S <sub>3</sub> /Au                                               | 0.69                   | 5.4        | 51.2      | 14.3                                         | [10] |
|                                                                                                           | FTO/TiO <sub>2</sub> /Sb <sub>2</sub> S <sub>3</sub> /spiro-OMeTAD/SbCl <sub>3</sub> /Au               | 0.72                   | 7.1        | 57.18     | 17.24                                        | [11] |
|                                                                                                           | FTO/c-TiO <sub>2</sub> /Cs <sub>2</sub> CO <sub>3</sub> /Sb <sub>2</sub> S <sub>3</sub> /P3HT/Au       | 0.596                  | 3.97       | 56.89     | 11.71                                        | [12] |
|                                                                                                           | FTO/TiO <sub>2</sub> /Sb <sub>2</sub> Se <sub>3</sub> /SpiroOMeTAD/Au                                  | 0.275                  | 2.0        | 37.7      | 19.7                                         | [13] |
|                                                                                                           | FTO/TiO <sub>2</sub> /Sb <sub>2</sub> Se <sub>3</sub> /PCDTBT/Au                                       | 0.419                  | 6.56       | 48.5      | 32.3                                         | [14] |
|                                                                                                           | FTO/TiO <sub>2</sub> /Sb <sub>2</sub> Se <sub>3</sub> /PbS CQD/Au                                      | 0.386                  | 7.62       | 60.6      | 32.6                                         | [15] |
| FTO/c-TiO <sub>2</sub> /Sb <sub>2</sub> (S <sub>1-x</sub> Se <sub>x</sub> ) <sub>3</sub> /spiro-OMeTAD/Au | 0.491                                                                                                  | 7.42                   | 59.5       | 25.4      | [16]                                         |      |
| FTO/TiO <sub>2</sub> /Sb <sub>2</sub> (S <sub>1-x</sub> Se <sub>x</sub> ) <sub>3</sub> /spiro-OMeTAD/Au   | 0.56                                                                                                   | 5.71                   | 52.34      | 19.48     | [17]                                         |      |
| FTO/mp-TiO <sub>2</sub> /Sb <sub>2</sub> Se <sub>3</sub> /Sb <sub>2</sub> S <sub>3</sub> /P3HT/Au         | 0.478                                                                                                  | 6.6                    | 55.6       | 24.9      | [18]                                         |      |
| Al <sub>2</sub> O <sub>3</sub>                                                                            | FTO/Al <sub>2</sub> O <sub>3</sub> /Sb <sub>2</sub> S <sub>3</sub> /P3HT/PEDOT:PSS/Ag                  | 0.674                  | 2.48       | 43.7      | 7.8                                          | [19] |
| ZrO                                                                                                       | FTO/ZrO <sub>2</sub> /Sb <sub>2</sub> S <sub>3</sub> /P3HT/PEDOT:PSS/Ag                                | 0.712                  | 2.64       | 53.5      | 6.8                                          | [19] |
| SnO <sub>2</sub>                                                                                          | FTO/SnO <sub>2</sub> /Sb <sub>2</sub> S <sub>3</sub> /P3HT/Au                                          | 0.56                   | 1.32       | 45.4      | 5.2                                          | [20] |
|                                                                                                           | FTO/SnO <sub>2</sub> /Sb <sub>2</sub> S <sub>3</sub> /P3HT/Au                                          | 0.585                  | 2.8        | 45.24     | 10.57                                        | [6]  |
|                                                                                                           | FTO/SnO <sub>2</sub> /Sb <sub>2</sub> Se <sub>3</sub> /Au                                              | 0.32                   | 3.05       | 38.64     | 25.26                                        | [21] |
|                                                                                                           | FTO/SnO <sub>2</sub> /Sb <sub>2</sub> Se <sub>3</sub> /Au                                              | 0.312                  | 2.33       | 39.35     | 18.47                                        | [22] |
| ZnO                                                                                                       | FTO/ZnO/Sb <sub>2</sub> Se <sub>3</sub> /Au                                                            | 0.366                  | 3.22       | 40.5      | 23.6                                         | [23] |
|                                                                                                           | FTO/r-ZnO/Sb <sub>2</sub> Se <sub>3</sub> /Au                                                          | 0.391                  | 5.93       | 57.8      | 26.2                                         | [24] |
| In <sub>2</sub> S <sub>3</sub>                                                                            | Mo-foil/MoSe <sub>2</sub> /Sb <sub>2</sub> Se <sub>3</sub> /In <sub>2</sub> S <sub>3</sub> /IZO/ITO/Au | 0.37                   | 5.35       | 51.9      | 28.22                                        | [25] |
| ZnO/ZnMgO                                                                                                 | FTO/ZnO/ZnMgO/Sb <sub>2</sub> Se <sub>3</sub> /Au                                                      | 0.360                  | 4.45       | 48        | 26.2                                         | [23] |
| TiO <sub>2</sub> /CdS                                                                                     | FTO/TiO <sub>2</sub> /CdS/Sb <sub>2</sub> Se <sub>3</sub> /SpiroOMeTAD/Au                              | 0.340                  | 3.9        | 41.9      | 27.2                                         | [13] |
|                                                                                                           | FTO/ TiO <sub>2</sub> /CdS/Sb <sub>2</sub> (S,Se) <sub>3</sub> /Spiro-OMeTAD / Au                      | 0.792                  | 5.73       | 60.9      | 12.03                                        | [26] |
|                                                                                                           | FTO/TiO <sub>2</sub> /CdS/Sb <sub>2</sub> (S,Se) <sub>3</sub> /C/Ag                                    | 0.51                   | 5.47       | 48.98     | 22.03                                        | [27] |
|                                                                                                           | FTO / TiO <sub>2</sub> /In: CdS / Sb <sub>2</sub> (S,Se) <sub>3</sub> /Spiro-OMeTAD/Au                 | 0.59                   | 6.63       | 62.39     | 18.14                                        | [28] |
| CdS/SnO <sub>2</sub>                                                                                      | FTO/CdS/SnO <sub>2</sub> /Sb <sub>2</sub> Se <sub>3</sub> /Au                                          | 0.360                  | 5.27       | 52.96     | 27.8                                         | [22] |
|                                                                                                           | FTO/CdS/SnO <sub>2</sub> /Sb <sub>2</sub> Se <sub>3</sub> /Au                                          | 0.432                  | 7.5        | 63.2      | 27.6                                         | [29] |

|                                     |                                                                                 |       |      |       |       |      |
|-------------------------------------|---------------------------------------------------------------------------------|-------|------|-------|-------|------|
| SnO <sub>2</sub> /CdS               | FTO/SnO <sub>2</sub> /CdS/Sb <sub>2</sub> Se <sub>3</sub> /Au                   | 0.385 | 5.18 | 55    | 24.5  | [30] |
|                                     | FTO/SnO <sub>2</sub> /CdS/Sb <sub>2</sub> (S,Se) <sub>3</sub> /C/Ag             | 0.74  | 5.2  | 55.8  | 12.5  | [31] |
| ZnO/CdS                             | FTO/ZnO/CdS/ Sb <sub>2</sub> (S,Se) <sub>3</sub> /Au                            | 0.48  | 5.73 | 54.5  | 21.89 | [32] |
| Cd <sub>x</sub> Zn <sub>1-x</sub> S | Mo/Sb <sub>2</sub> Se <sub>3</sub> /Cd <sub>x</sub> Zn <sub>1-x</sub> S/IZO/AZO | 0.403 | 6.71 | 64.78 | 25.69 | [33] |

70

71 **Table S2** Recipes of CdS deposited by CBD method.

| [Cd <sup>2+</sup> ] <sup>a</sup> | [S <sup>2-</sup> ] <sup>b</sup> | NH <sub>4</sub> OH | Deposition time | Deposition Temp. |
|----------------------------------|---------------------------------|--------------------|-----------------|------------------|
| 0.3 mmol                         | 16 mmol                         | 0.38 mol           | 0-18 min        | 65°C             |

72 a: Cd<sup>2+</sup>, CdSO<sub>4</sub>;

73 b: S<sup>2-</sup>, CH<sub>4</sub>N<sub>2</sub>S, thiourea.

74 Details for CdS layer deposition. First, 140 ml deionized water, 20 ml (0.3 mmol) CdSO<sub>4</sub> solution, and  
75 26 ml (0.38 mol) NH<sub>3</sub>·H<sub>2</sub>O solution were mixed and stirred for two minutes. Then, 13 ml (16 mmol)  
76 CH<sub>4</sub>N<sub>2</sub>S solution was added into the above solution and stirred for another 30 seconds. After that, the  
77 chemically cleaned FTO substrates were immersed into the precursor solution within the glass beaker,  
78 which was subsequently transferred to a hot water bath deposition system where the temperature was set  
79 at 65°C. After deposition, the coated samples were rinsed thoroughly with deionized water and then  
80 blow-dried with N<sub>2</sub>.

81

82 **Table S3** Recipes of Zn(O,S) deposited by CBD method.

| [Zn <sup>2+</sup> ] <sup>a</sup> | [S <sup>2-</sup> ] <sup>b</sup> | [Complex agent] <sup>c</sup> | NH <sub>4</sub> OH | Deposition time | Deposition Temp. |
|----------------------------------|---------------------------------|------------------------------|--------------------|-----------------|------------------|
| 2.5 mmol                         | 1.5 mmol                        | 1.3 mmol                     | 0.27 mol           | 15 min          | 85°C             |

83 a: Zn<sup>2+</sup>, ZnSO<sub>4</sub>;

84 b: S<sup>2-</sup>, C<sub>2</sub>H<sub>5</sub>NS, thioacetamide;

85 c: C<sub>6</sub>H<sub>5</sub>Na<sub>3</sub>O<sub>7</sub>·2H<sub>2</sub>O, trisodium citrate.

86 Details for Zn(O,S) layer deposition. First, 166 ml deionized water, 7.5 ml (2.5 mmol) ZnSO<sub>4</sub> solution,  
87 and 2.5 ml (1.3 mmol) C<sub>6</sub>H<sub>5</sub>Na<sub>3</sub>O<sub>7</sub>·2H<sub>2</sub>O solution were mixed and stirred for five minutes. Then, 6.25  
88 ml (1.5 mmol) C<sub>2</sub>H<sub>5</sub>NS solution and 18 ml (0.27 mol) NH<sub>3</sub>·H<sub>2</sub>O solution were added into the above  
89 solution and stirred for another 30 seconds. After that, the chemically cleaned FTO substrates were put  
90 into the precursor solution within the glass beaker, which was subsequently transferred to a hot water  
91 bath deposition system where the temperature was set at 85°C. After deposition, the coated samples  
92 were rinsed thoroughly with deionized water and then blow-dried with N<sub>2</sub>.

93

94

95 **References**

- 96 [1] Y. C. Choi, D. U. Lee, J. H. Noh, E. K. Kim, S. I. Seok, *Advanced Functional Materials* 2014, 24,  
97 3587.
- 98 [2] C. Jiang, R. Tang, X. Wang, H. Ju, G. Chen, T. Chen, *Solar RRL* 2019, 3.
- 99 [3] T. Zhang, L. Zhang, Y. Yin, C. Jiang, S. a. Li, C. Zhu, T. Chen, *Science China Materials* 2018, 62,  
100 899.
- 101 [4] J. A. Chang, S. H. Im, Y. H. Lee, H. J. Kim, C. S. Lim, J. H. Heo, S. I. Seok, *Nano Lett* 2012, 12,  
102 1863.
- 103 [5] R. Tang, X. Wang, C. Jiang, S. Li, G. Jiang, S. Yang, C. Zhu, T. Chen, *Journal of Materials*  
104 *Chemistry A* 2018, 6, 16322.
- 105 [6] H. Lei, G. Yang, Y. Guo, L. Xiong, P. Qin, X. Dai, X. Zheng, W. Ke, H. Tao, Z. Chen, B. Li, G.  
106 Fang, *Phys Chem Chem Phys* 2016, 18, 16436.
- 107 [7] Y. Yin, C. Wu, R. Tang, C. Jiang, G. Jiang, W. Liu, T. Chen, C. Zhu, *Science Bulletin* 2019, 64,  
108 136.
- 109 [8] J. Han, X. Pu, H. Zhou, Q. Cao, S. Wang, Z. He, B. Gao, T. Li, J. Zhao, X. Li, *ACS Appl Mater*  
110 *Interfaces* 2020, 12, 44297.
- 111 [9] R. Tang, X. Wang, C. Jiang, S. Li, W. Liu, H. Ju, S. Yang, C. Zhu, T. Chen, *ACS Appl Mater*  
112 *Interfaces* 2018, 10, 30314.
- 113 [10] H. Deng, Y. Zeng, M. Ishaq, S. Yuan, H. Zhang, X. Yang, M. Hou, U. Farooq, J. Huang, K. Sun,  
114 R. Webster, H. Wu, Z. Chen, F. Yi, H. Song, X. Hao, J. Tang, *Advanced Functional Materials* 2019, 29.
- 115 [11] J. Han, S. Wang, J. Yang, S. Guo, Q. Cao, H. Tang, X. Pu, B. Gao, X. Li, *ACS Appl Mater*  
116 *Interfaces* 2020, 12, 4970.
- 117 [12] W. H. Kim, S. Woo, K. P. Kim, S. M. Kwon, D. H. Kim, *Nanoscale Res Lett* 2019, 14, 25.
- 118 [13] X. Wang, R. Tang, Y. Yin, H. Ju, S. a. Li, C. Zhu, T. Chen, *Solar Energy Materials and Solar Cells*  
119 2019, 189, 5.
- 120 [14] O. S. Hutter, L. J. Phillips, K. Durose, J. D. Major, *Solar Energy Materials and Solar Cells* 2018,  
121 188, 177.
- 122 [15] K. Li, C. Chen, S. Lu, C. Wang, S. Wang, Y. Lu, J. Tang, *Adv Mater* 2019, 31, e1903914.
- 123 [16] C. Wu, W. Lian, L. Zhang, H. Ding, C. Jiang, Y. Ma, W. Han, Y. Li, J. Zhu, T. Chen, C. Zhu,  
124 *Solar RRL* 2020, 4.
- 125 [17] Y. Zhang, J. Li, G. Jiang, W. Liu, S. Yang, C. Zhu, T. Chen, *Solar RRL* 2017, 1.
- 126 [18] Y. C. Choi, Y. H. Lee, S. H. Im, J. H. Noh, T. N. Mandal, W. S. Yang, S. I. Seok, *Advanced Energy*  
127 *Materials* 2014, 4.
- 128 [19] T. Englman, E. Terkieltaub, L. Etgar, *The Journal of Physical Chemistry C* 2015, 119, 12904.
- 129 [20] H. Lei, T. Lin, X. Wang, S. Zhang, Q. Cheng, X. Chen, Z. Tan, J. Chen, *Materials Letters* 2018,  
130 233, 90.
- 131 [21] S. Lu, Y. Zhao, C. Chen, Y. Zhou, D. Li, K. Li, W. Chen, X. Wen, C. Wang, R. Kondrotas, N.  
132 Lowe, J. Tang, *Advanced Electronic Materials* 2018, 4.
- 133 [22] H. Guo, Z. Chen, X. Wang, Q. Cang, C. Ma, X. Jia, N. Yuan, J. Ding, *Journal of Materials*  
134 *Chemistry C* 2019, 7, 14350.
- 135 [23] K. Li, R. Kondrotas, C. Chen, S. Lu, X. Wen, D. Li, J. Luo, Y. Zhao, J. Tang, *Solar Energy* 2018,  
136 167, 10.
- 137 [24] L. Wang, D.-B. Li, K. Li, C. Chen, H.-X. Deng, L. Gao, Y. Zhao, F. Jiang, L. Li, F. Huang, Y. He,  
138 H. Song, G. Niu, J. Tang, *Nature Energy* 2017, 2.



139 [25] C. Wang, S. Lu, S. Li, S. Wang, X. Lin, J. Zhang, R. Kondrotas, K. Li, C. Chen, J. Tang, Nano  
140 Energy 2020, 71.

141 [26] W. Wang, X. Wang, G. Chen, B. Chen, H. Cai, T. Chen, S. Chen, Z. Huang, C. Zhu, Y. Zhang,  
142 Solar RRL 2018, 2.

143 [27] O. A. Jaramillo-Quintero, M. E. Rincón, G. Vásquez-García, P. K. Nair, Progress in Photovoltaics:  
144 Research and Applications 2018, 26, 709.

145 [28] C. Wu, C. Jiang, X. Wang, H. Ding, H. Ju, L. Zhang, T. Chen, C. Zhu, ACS Appl Mater Interfaces  
146 2019, 11, 3207.

147 [29] J. Tao, X. Hu, Y. Guo, J. Hong, K. Li, J. Jiang, S. Chen, C. Jing, F. Yue, P. Yang, C. Zhang, Z.  
148 Wu, J. Tang, J. Chu, Nano Energy 2019, 60, 802.

149 [30] K. Shen, C. Ou, T. Huang, H. Zhu, J. Li, Z. Li, Y. Mai, Solar Energy Materials and Solar Cells  
150 2018, 186, 58.

151 [31] L. Yao, L. Lin, H. Liu, F. Wu, J. Li, S. Chen, Z. Huang, G. Chen, Journal of Materials Science &  
152 Technology 2020, 58, 130.

153 [32] M. Ishaq, H. Deng, S. Yuan, H. Zhang, J. Khan, U. Farooq, H. Song, J. Tang, Solar RRL 2018, 2.

154 [33] G. Li, Z. Li, X. Liang, C. Guo, K. Shen, Y. Mai, ACS Appl Mater Interfaces 2019, 11, 828.

155
